# Supplementary material for: Regulation of symbiotic interactions and primitive lichen differentiation by UMP1 MAP kinase in Umbilicaria muhlenbergii
Source: Research Square preprint supplement (doi:10.21203/rs.3.rs-3011961/v1), 2023-06-15
Supplement: Supplementary file 1 [file 5c46cad9a94c10a4a7960ac2.pdf]

**Regulation of symbiotic interactions and primitive lichen differentiation by *UMPI* MAP kinase in *Umbilicaria muhlenbergii***

Yanyan Wang<sup>1,2</sup>, Rong Li<sup>1</sup>, Diwen Wang<sup>2</sup>, Ben Qian<sup>1</sup>, Zhuyun Bian<sup>2</sup>, Jiangchun Wei<sup>1</sup>, Xinli Wei<sup>1\*</sup>, and Jin-Rong Xu<sup>2\*</sup>

<sup>1</sup> State Key Laboratory of Mycology, Institute of Microbiology, Chinese Academy of Sciences, Beijing, 100101. China.

<sup>2</sup> Dept. of Botany and Plant Pathology, Purdue University, West Lafayette, IN 47907. USA.

**This pdf includes:**

Supplemental Figures 1-5

Supplemental Table 1

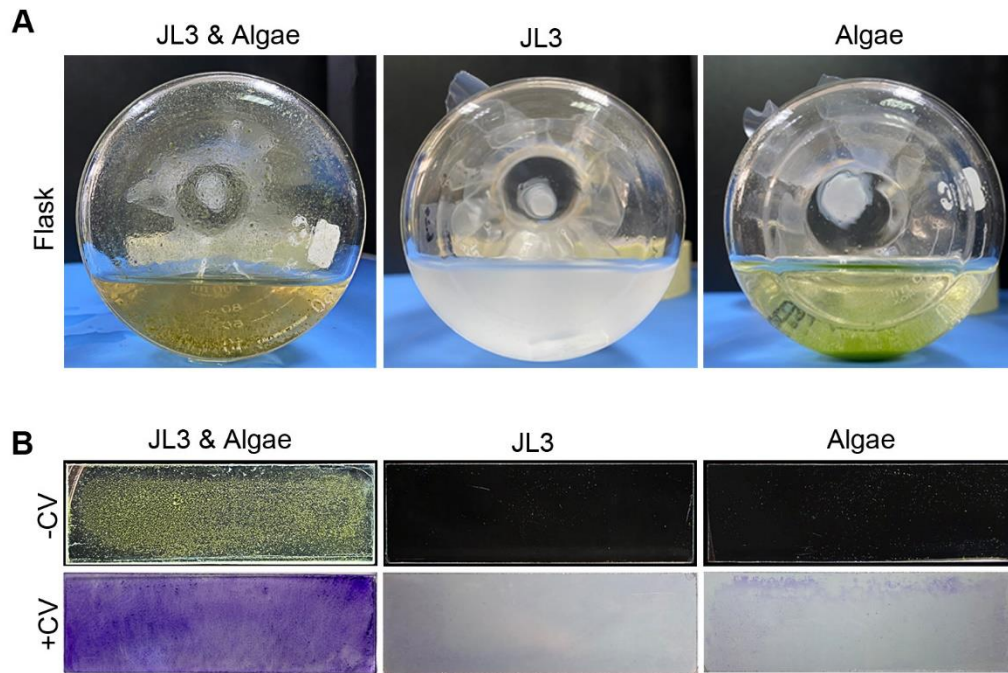

**Supplemental Figure 1. Formation of the fungal-algal complex on glass.**

**A.** Flasks containing marked 10-day-old 0.1×PDB cultures were examined for cell masses adhered to the bottom after vigorous shaking. A granular layer of cell masses adhered to the bottom of flasks was observed only in co-cultures of *U. muhlenbergii* JL3 and *T. jamesii* algal cells (1:10). **B.** Slide glasses submerged in the marked 0.1×PDB cultures for 10 days were gently rinsed and directly examined or examined after staining with crystal violet (CV). A greenish (no staining) or purplish (after CV staining) layer was observed in fungal-algal cocultures but not in JL3 and *T. jamesii* cells cultured alone.

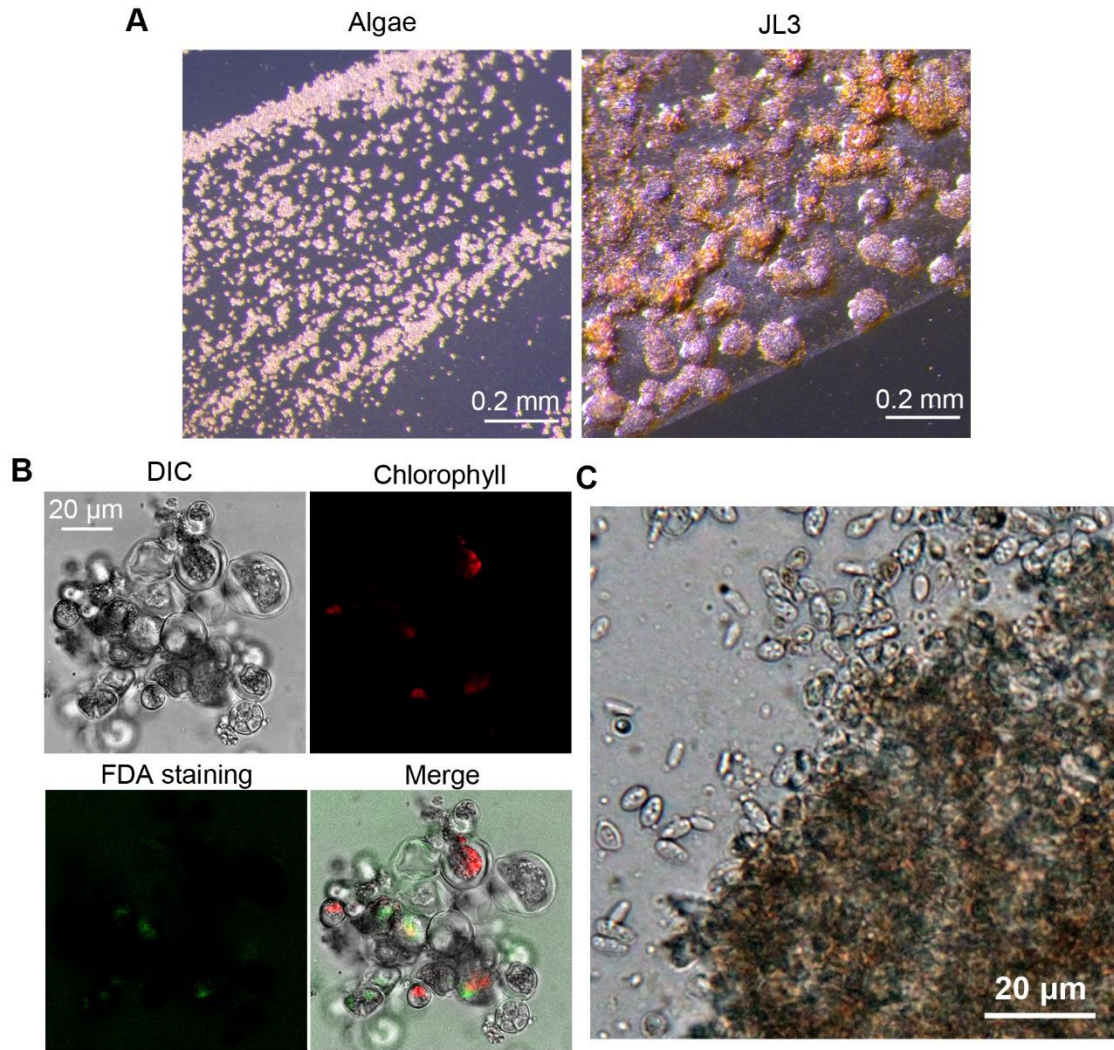

**Supplemental Figure 2. Algal or fungal cells cultured separately on cellulose membranes for 3-month.**

**A)** Algal or fungal cells (JL3) cultured on cellulose membranes for three months. **B)** Algal cells were stained with FDA and observed by DIC and epifluorescence microscopy. Most of the algal cells appeared to be dead or damaged and lack chlorophyll autofluorescence. **C)** Yeast cells of *U. muhlenbergii*. The aggregated cells tend to be brownish and some of yeast cells were empty or dead.

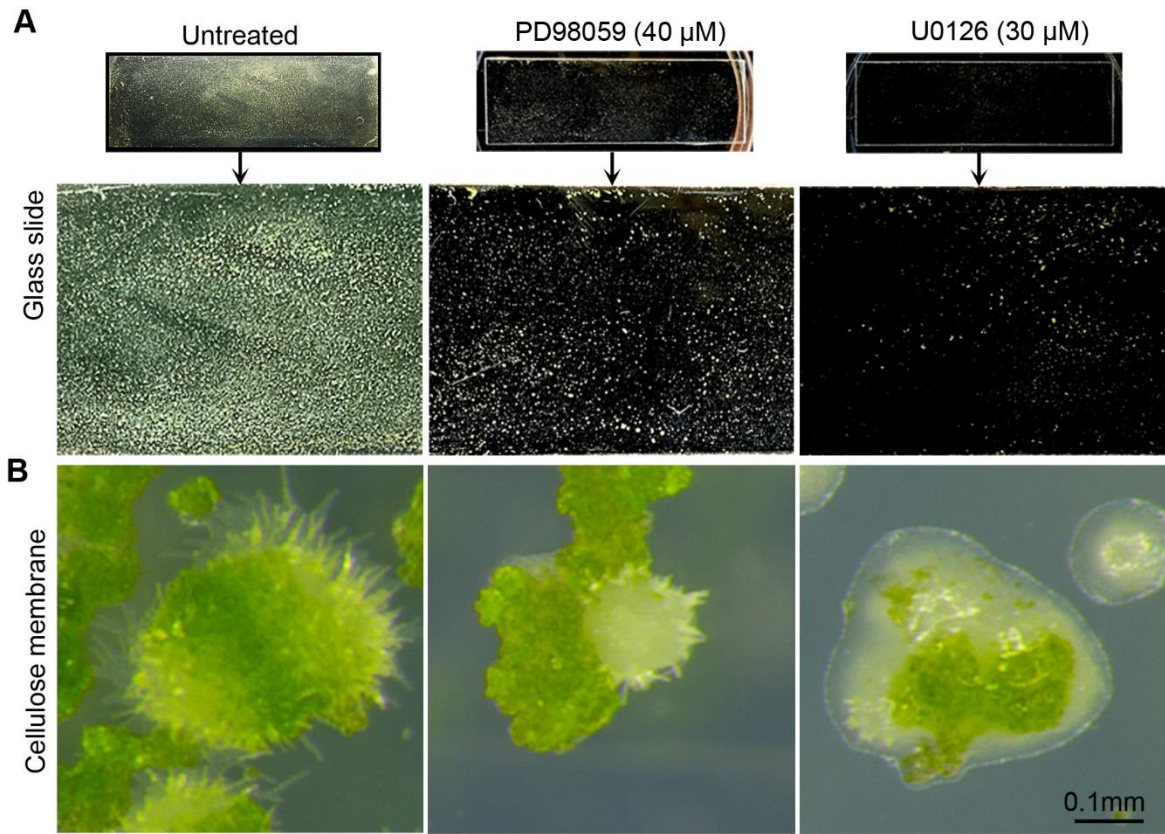

### Supplemental Figure 3. Effects of MEK inhibitors on fungal-algal interactions.

**A)** Slide glasses submerged in the 0.1xPDB cultures of fungal and algal cells (1:10) with or without labelled MEK inhibitors for 10 days were gently rinsed before examination. U0126 was more effective than PD98059 in inhibiting the formation of greenish fungal-algal symbiotic complex. **B)** The mixture of fungal-algal cells (1:10) was cultured on cellulose membranes laid over 0.1xPDA with or without labelled MEK inhibitors for 10 days. Treatments with both inhibitors, particularly U0126 significantly reduced the formation of fungal-algal symbiotic complexes, resulting the growth of whitish yeast cells and greenish algal cells separately. U0126 inhibited pseudohyphal growth and eliminated hairy appearance of the fungal-cell masses.

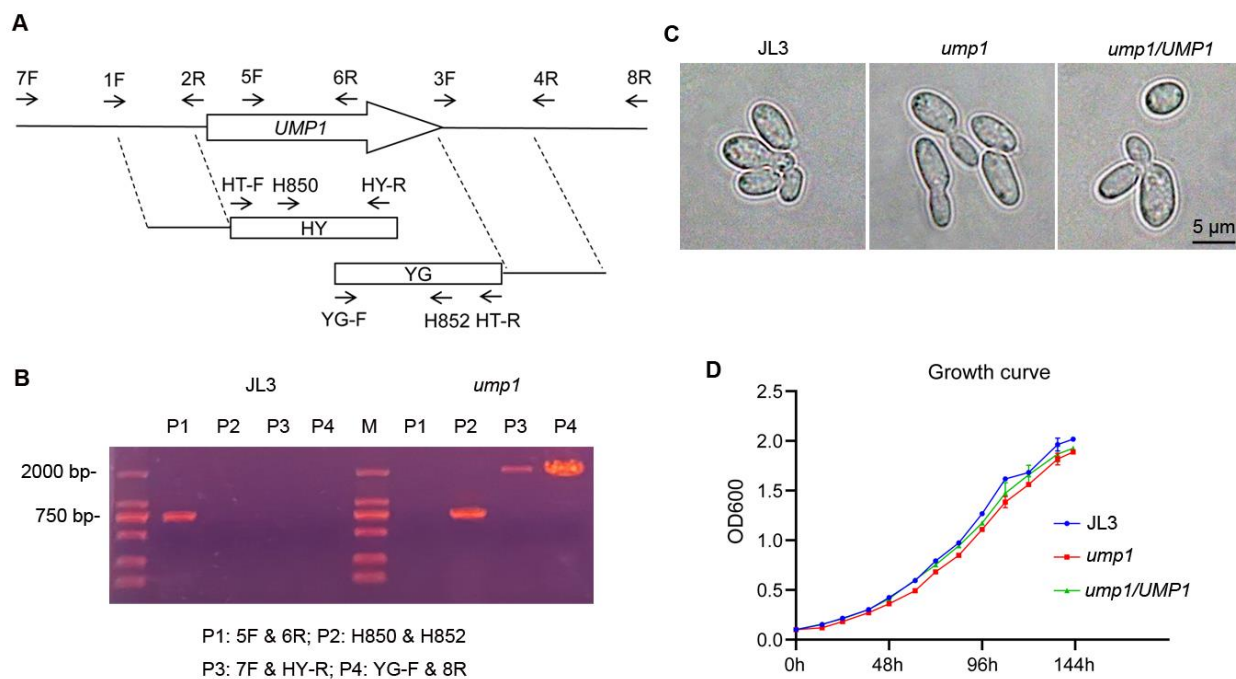

#### Supplemental Figure 4. The *UMP1* gene replacement mutant and complementation.

**A)** Diagram of the *UMP1* gene, fragments of the *hph* cassette (HY and YG), and PCR primers used to generate and verify the *ump1* deletion mutant. **B)** Verification of the *UMP1* gene replacement event by PCR with marked primers in the *ump1* mutant ud1. JL3 is the wild-type strain. **C)** Yeast cells of JL3, *ump1* mutant, and *ump1/UMP1* complementation transformant. **D)** Growth rate of the same set of strain was measured with OD<sub>600</sub>. Yeast cells of each strain were inoculated into 200 ml PDB, adjusted to OD<sub>600</sub> to 0.1, incubated at 25°C with gentle shaking (100 rpm), and measured every 12 h for 144 h. Means and standard deviations were calculated from data from three independent replicates.

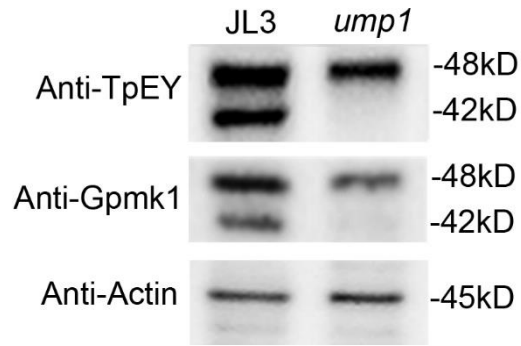

**Supplemental Figure 5. Assays for the expression and phosphorylation of Ump1.**

Western blots of proteins isolated from the wild-type strain JL3 and *ump1* mutant were detected with marked antibodies. The 42-kD Ump1 band was detected in JL3 but not in the *ump1* mutant. In contrast, the 48-kD UmMps1 band was detected in both strains. Detection with an anti-actin antibody was used as the loading control.

62 **Supplemental Table 1. Primers used in this study.**

| <b>Primer</b> | <b>Sequence (5'-3')</b>                        | <b>Application</b>             |
|---------------|------------------------------------------------|--------------------------------|
| <b>1F</b>     | TGCGAGGGGATGTTAAGGGA                           | <i>UMP1</i> knockout           |
| <b>2R</b>     | AATGCTCCTTCAATATCATCTTCTGTACTTACTAACTCATGGCTGC | <i>UMP1</i> knockout           |
| <b>3F</b>     | CGTCCGCAATGTGTTATTAAGTCGACGTTGTAAGATTAGATGGTCG | <i>UMP1</i> knockout           |
| <b>4R</b>     | AGTATACTTTCCTGCGTCGG                           | <i>UMP1</i> knockout           |
| <b>5F</b>     | TACGGCTCCAGGTACGGGT                            | <i>UMP1</i> knockout           |
| <b>6R</b>     | ATCCAGGTATGCTAAACCTCA                          | <i>UMP1</i> knockout           |
| <b>7F</b>     | AGGATTTCCGGGTGGAGTT                            | <i>UMP1</i> knockout           |
| <b>8R</b>     | CCACGGTTGTGACAGTCGCT                           | <i>UMP1</i> knockout           |
| <b>HT-F</b>   | ACAGAAGATGATATTGAAGGAGC                        | <i>hph</i> cassette            |
| <b>HT-R</b>   | GTCGACTTAATAACACATTGCGGACGT                    | <i>hph</i> cassette            |
| <b>HY-R</b>   | GTATTGACCG ATTCCTTGCG GTCCGAA                  | <i>hph</i> cassette            |
| <b>YG-F</b>   | GATGTAGGAGGGCGTGGATATGTCCT                     | <i>hph</i> cassette            |
| <b>H850</b>   | TTCCTCCCTTTATTTTCAGATTCAA                      | <i>hph</i> cassette            |
| <b>H852</b>   | ATGTTGGCGACCTCGTATTGG                          | <i>hph</i> cassette            |
| <b>C1F</b>    | AGGGAACAAAAGCTGGGTACCCCGACCTCCAAGCCCCTCACGT    | <i>UMP1</i><br>complementation |
| <b>C2R</b>    | TCGCCCTTGCTCACCATAAGCTTATAAAGATCGAAGCAAGAGGGA  | <i>UMP1</i><br>complementation |
| <b>C3F</b>    | ATGGACGAGCTGTACAAGTAACTTACTAACTCATGGCTGCA      | <i>UMP1</i><br>complementation |
| <b>C4R</b>    | GATGATTTTCAGTAACGTTAAGTATTTATCGAATGAAGACTTTC   | <i>UMP1</i><br>complementation |

63
